# Supplementary material for: Chromosome-level genome assembly of the Chinese longsnout catfish Leiocassis longirostris
Source: PubMed Central journal article supplement — Zool Res. 2021 Jul 18;42(4):417–22. doi: 10.24272/j.issn.2095-8137.2020.327 (PMC8317178; doi:10.24272/j.issn.2095-8137.2020.327), 2021-07-18
Supplement: zr-42-4-417-S1.pdf [file zr-42-4-417-S1.pdf]

Supplementary Materials  
Supplementary Figures

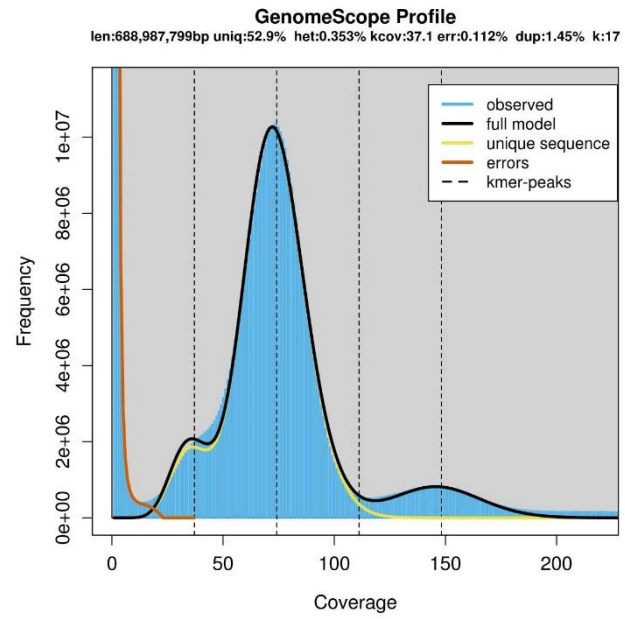

Supplementary Figure S1 *K*-mer frequency distribution of *L. longirostris*

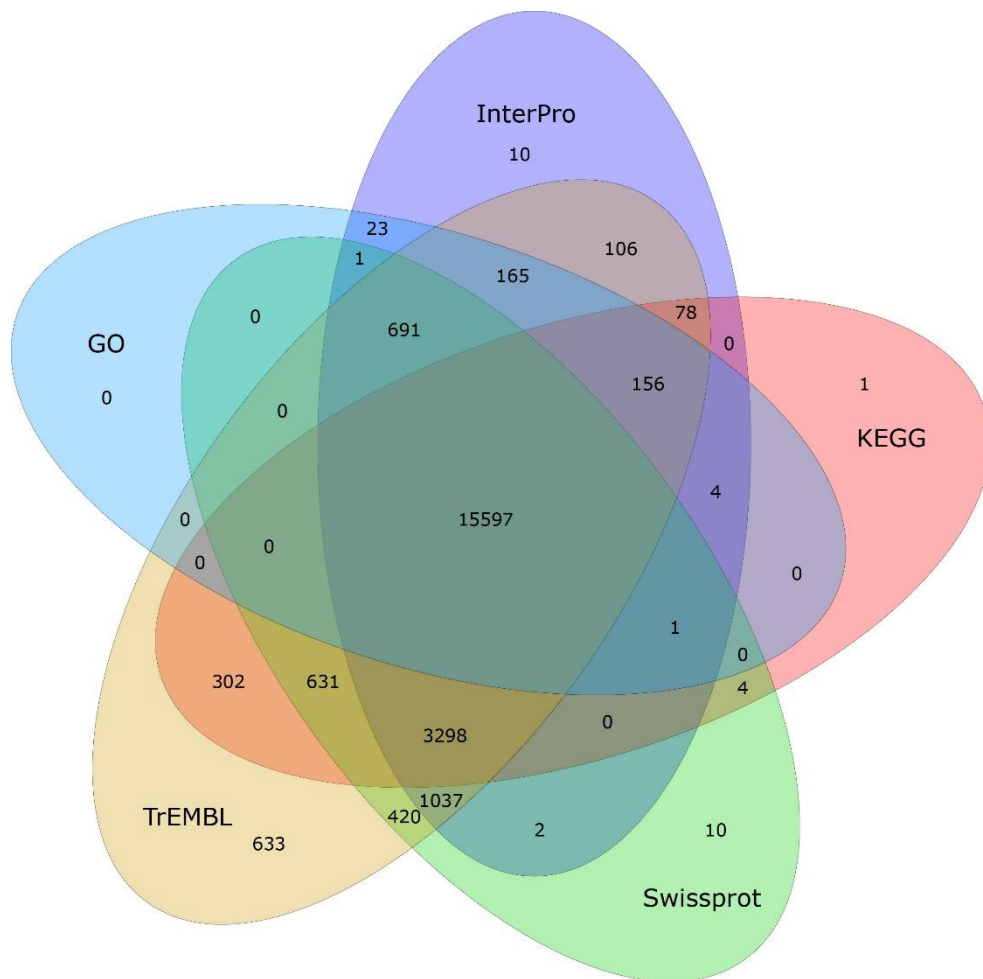

Supplementary Figure S2 Venn diagram of gene function annotation

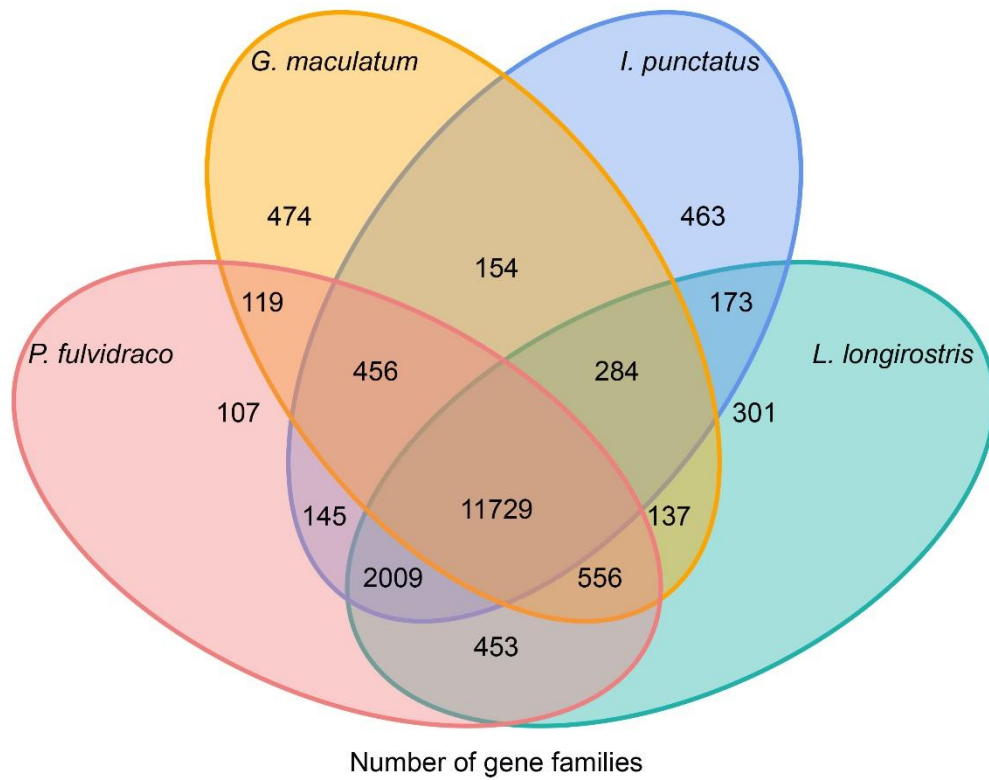

Supplementary Figure S3 Venn diagram of orthologous genes

## Supplementary Tables

Supplementary Table S1 Sequencing data for *L. longirostris* genome assembly

| Types         | Sequencing strategy | Insert size (bp) | Raw data (Gb) | Clean data (Gb) | Mean read length (bp) | Sequence coverage (X) |
|---------------|---------------------|------------------|---------------|-----------------|-----------------------|-----------------------|
| Genome        | BGI-SEQ500          | 200-300          | 76.93         | 64.11           | 100                   | 93.05                 |
|               | Nanopore            | -                | 43.23         | -               | 24,300                | 61.48                 |
|               | Hi-C                | -                | 243.13        | 126.35          | 100                   | 179.63                |
| Transcriptome | Illumina            | 250-300          | 9.83          | 9.65            | 150                   | -                     |

Supplementary Table S2 Assembly statistics of *L. longirostris* genome

| Genome assembly   | Contig Length (bp) | Contig number |
|-------------------|--------------------|---------------|
| Total             | 703,192,559        | 389           |
| Max               | 16,905,276         |               |
| Number $\geq$ 2kb |                    |               |
| N50               | 4,293,955          |               |
| N60               |                    |               |
| N70               |                    |               |
| N80               |                    |               |
| N90               | 998,020            |               |

Supplementary Table S3 Summary of 26 assembled chromosomes in *L. longirostris* genome

| <b>Chromosomes</b> | <b>Length (Mbp)</b> | <b>Percentage</b> |
|--------------------|---------------------|-------------------|
| Chr1               | 43.97               | 6.25              |
| Chr2               | 40.42               | 5.75              |
| Chr3               | 36.30               | 5.16              |
| Chr4               | 33.36               | 4.74              |
| Chr5               | 33.31               | 4.74              |
| Chr6               | 32.52               | 4.62              |
| Chr7               | 31.99               | 4.55              |
| Chr8               | 30.13               | 4.28              |
| Chr9               | 29.33               | 4.17              |
| Chr10              | 29.08               | 4.13              |
| Chr11              | 28.03               | 3.98              |
| Chr12              | 27.85               | 3.96              |
| Chr13              | 25.36               | 3.61              |
| Chr14              | 24.16               | 3.43              |
| Chr15              | 24.11               | 3.43              |
| Chr16              | 23.71               | 3.37              |
| Chr17              | 21.98               | 3.12              |
| Chr18              | 21.32               | 3.03              |
| Chr19              | 20.55               | 2.92              |
| Chr20              | 19.22               | 2.73              |
| Chr21              | 18.90               | 2.69              |
| Chr22              | 18.86               | 2.68              |
| Chr23              | 18.31               | 2.60              |
| Chr24              | 17.81               | 2.53              |
| Chr25              | 17.40               | 2.47              |
| Chr26              | 17.36               | 2.47              |
| Linked Total       | 685.35              | 97.44             |
| Unlinked Total     | 18.03               | 2.56              |

Supplementary Table S4-1 Classification of repeat elements in *L. longirostris* genome

| Type           | Rebase TEs  |             | <i>De novo</i> TEs |             | TE protiens |             | Combined TEs |             |
|----------------|-------------|-------------|--------------------|-------------|-------------|-------------|--------------|-------------|
|                | Length (Mb) | % in genome | Length (Mb)        | % in genome | Length (Mb) | % in genome | Length (Mb)  | % in genome |
| <b>DNA</b>     | 80.23       | 11.41       | 107.28             | 15.25       | 948.20      | 0.13        | 146.40       | 20.81       |
| <b>LINE</b>    | 30.71       | 4.37        | 64.31              | 9.14        | 19.22       | 2.73        | 82.19        | 11.68       |
| <b>SINE</b>    | 15.34       | 2.18        | 6.28               | 0.89        | 0           | 0.00        | 20.52        | 2.92        |
| <b>LTR</b>     | 19.17       | 2.73        | 68.24              | 9.7         | 8.42        | 1.2         | 78.65        | 11.18       |
| <b>Others</b>  | 0.03        | 0.00        | 0                  | 0.00        | 0           | 0.00        | 0.03         | 0.00        |
| <b>Unknown</b> | 0           | 0.00        | 1.96               | 0.28        | 0           | 0.00        | 1.96         | 0.28        |
| <b>Total</b>   | 129.07      | 18.35       | 214.87             | 30.55       | 28.53       | 4.06        | 239.11       | 33.99       |

Supplementary Table S4-2 Proportion of repetitive elements in partial teleost genomes

| Species                        | % in genome | References            |
|--------------------------------|-------------|-----------------------|
| <i>Leiocassis longirostris</i> | 33.99       | This study            |
| <i>Danio rerio</i>             | 52.2        | Howe et al., 2013     |
| <i>Onychostoma macrolepis</i>  | 46.23       | Sun et al., 2020      |
| <i>Bagarius yarrelli</i>       | 35.26       | Jiang et al., 2019    |
| <i>Glyptosternon maculatum</i> | 33.96       | Liu et al., 2018      |
| <i>Ictalurus punctatus</i>     | 32.56       | Chen et al., 2016     |
| <i>Cyprinus carpio</i>         | 31.3        | Xu et al., 2014       |
| <i>Oryzias latipes</i>         | 30.68       | Kasahara et al., 2007 |
| <i>Larimichthys crocea</i>     | 26.13       | Chen et al., 2019     |
| <i>Gasterosteus aculeatus</i>  | 13.48       | Jones et al., 2012    |
| <i>Fugu rubripes</i>           | 7.1         | Aparicio et al., 2002 |
| <i>Tetraodon nigroviridis</i>  | 5.7         | Van de Peer, 2004     |

## REFERENCES

- Howe, K., Clark, M. D., Torroja, C. F., Torrance, J., Berthelot, C., Muffato, M., ... Stemple, D. L. (2013). The zebrafish reference genome sequence and its relationship to the human genome. *Nature*, 496(7446), 498–503. doi: 10.1038/nature12111
- Sun, L., Gao, T., Wang, F., Qin, Z., Yan, L., Tao, W., ... Wang, D. (2020). Chromosome-level genome assembly of a cyprinid fish *Onychostoma macrolepis* by integration of nanopore sequencing, Bionano and Hi-C technology. *Molecular Ecology Resources*. doi: 10.1111/1755-0998.13190
- Jiang, W., Lv, Y., Cheng, L., Yang, K., Bian, C., Wang, X., ... Shi, Q. (2019). Whole-Genome Sequencing of the Giant Devil Catfish, *Bagarius yarrelli*. *Genome Biology and Evolution*, 11(8), 2071–2077. doi: 10.1093/gbe/evz143
- Liu, H., Liu, Q., Chen, Z., Liu, Y., Zhou, C., Liang, Q., ... Mou, Z. (2018). Draft genome of *Glyptosternon maculatum*, an endemic fish from Tibet Plateau. *Gigascience*, 7(9). doi: 10.1093/gigascience/giy104
- Chen, X., Zhong, L., Bian, C., Xu, P., Qiu, Y., You, X., ... Bian, W. (2016). High-quality genome assembly of channel catfish, *Ictalurus punctatus*. *Gigascience*, 5, 39. doi:

10.1186/s13742-016-0142-5

Xu, P., Zhang, X., Wang, X., Li, J., Liu, G., Kuang, Y., ... Sun, X. (2014). Genome sequence and genetic diversity of the common carp, *Cyprinus carpio*. *Nature Genetics*, *46*(11), 1212–1219. doi: 10.1038/ng.3098

Kasahara, M., Naruse, K., Sasaki, S., Nakatani, Y., Qu, W., Ahsan, B., ... Kohara, Y. (2007). The medaka draft genome and insights into vertebrate genome evolution. *Nature*, *447*(7145), 714–719. doi: 10.1038/nature05846

Chen, B., Zhou, Z., Ke, Q., Wu, Y., Bai, H., Pu, F., & Xu, P. (2019). The sequencing and de novo assembly of the *Larimichthys crocea* genome using PacBio and Hi-C technologies. *Scientific Data*, *6*, 188. doi: 10.1038/s41597-019-0194-3

Jones, F. C., Grabherr, M. G., Chan, Y. F., Russell, P., Mauceli, E., Johnson, J., ... Kingsley, D. M. (2012). The genomic basis of adaptive evolution in threespine sticklebacks. *Nature*, *484*(7392), 55–61. doi: 10.1038/nature10944

Aparicio, S., Chapman, J., Stupka, E., Putnam, N., Chia, J., Dehal, P., ... Brenner, S. (2002). Whole-genome shotgun assembly and analysis of the genome of *Fugu rubripes*. *Science*, *297*(5585), 1301–1310. doi: 10.1126/science.1072104

Van de Peer, Y. (2004). Tetraodon genome confirms Takifugu findings: Most fish are ancient polyploids. *Genome Biology*, *5*(12), 250. doi: 10.1186/gb-2004-5-12-250

Supplementary Table S5 Statistics of predicted protein-coding genes in *L. longirostris* genome

| Method            |                         | Gene numbers | Average gene length (bp) | Average CDS length (bp) | Average intron length (bp) | Average exon length (bp) | Average exon per gene |
|-------------------|-------------------------|--------------|--------------------------|-------------------------|----------------------------|--------------------------|-----------------------|
| <b>Homolog</b>    | <i>D. rerio</i>         | 22,607       | 24,906.24                | 1,586.43                | 2,991.09                   | 180.35                   | 8.80                  |
|                   | <i>G. aculeatus</i>     | 19,515       | 14,591.05                | 1,522.77                | 1,622.74                   | 168.20                   | 9.05                  |
|                   | <i>I. punctatus</i>     | 23,916       | 19,607.43                | 1,698.77                | 2,068.38                   | 175.89                   | 9.66                  |
|                   | <i>L. crocea</i>        | 19,859       | 21,505.49                | 1,685.09                | 2,269.19                   | 173.10                   | 9.73                  |
|                   | <i>O. niloticus</i>     | 19,427       | 25,587.29                | 1,664.02                | 2,771.77                   | 172.78                   | 9.63                  |
|                   | <i>O. latipe</i>        | 19,122       | 58,907.43                | 1,603.53                | 7,358.53                   | 182.48                   | 8.79                  |
|                   | <i>P. hypophthalmus</i> | 22,691       | 20,471.44                | 1,737.03                | 2,119.68                   | 176.56                   | 9.84                  |
|                   | <i>T. fulvidraco</i>    | 25,662       | 19,646.64                | 1,676.25                | 2,081.63                   | 174.01                   | 9.63                  |
|                   | <i>T. rubripes</i>      | 18,205       | 16,156.31                | 1,440.29                | 1,964.65                   | 169.64                   | 8.49                  |
| <b>De novo</b>    | <b>Augustus</b>         | 23,758       | 14,112.19                | 1,448.53                | 1,734.99                   | 174.54                   | 8.30                  |
| <b>Transcript</b> | <b>PASA</b>             | 51,771       |                          |                         |                            |                          |                       |
| <b>Merge</b>      | <b>Glean</b>            | 23,708       | 16,546.44                | 1,792.67                | 1,547.65                   | 170.20                   | 10.53                 |



Supplementary Table S6 Statistics of gene function annotation in *L. longirostris* genome

|                    | <b>Number</b> | <b>Percent (%)</b> |
|--------------------|---------------|--------------------|
| <b>Total</b>       | 23,708        | 100                |
| <b>SwissProt</b>   | 21,692        | 91.50              |
| <b>KEGG</b>        | 20,072        | 84.66              |
| <b>TrEMBL</b>      | 23,114        | 97.49              |
| <b>InterPro</b>    | 21,169        | 89.29              |
| <b>GO</b>          | 16,638        | 70.18              |
| <b>Annotated</b>   | 23,170        | 97.73              |
| <b>Unannotated</b> | 538           | 2.27               |

Supplementary Table S7 Statistics of noncoding RNAs in *L. longirostris* genome

| <b>Type</b>  | <b>Copy</b>     | <b>Average length(bp)</b> | <b>Total length(bp)</b> | <b>Percentage in Genome (%)</b> |          |
|--------------|-----------------|---------------------------|-------------------------|---------------------------------|----------|
| <b>miRNA</b> | 422             | 85.1                      | 35,939                  | 0.005109                        |          |
| <b>tRNA</b>  | 2,118           | 75.07                     | 159,004                 | 0.022605                        |          |
| <b>rRNA</b>  | 919             | 110.83                    | 101,867                 | 0.014481                        |          |
| <b>rRNA</b>  | <b>18s</b>      | 14                        | 429.79                  | 6,017                           | 0.000855 |
|              | <b>28s</b>      | 60                        | 184.3                   | 11,058                          | 0.001572 |
|              | <b>5.8s</b>     | 3                         | 132                     | 396                             | 0.000056 |
|              | <b>5S</b>       | 842                       | 100.22                  | 84,386                          | 0.011997 |
| <b>snRNA</b> | <b>snRNA</b>    | 970                       | 139.93                  | 135,733                         | 0.019297 |
|              | <b>CD-box</b>   | 135                       | 122.78                  | 16,575                          | 0.002356 |
|              | <b>HACA-box</b> | 57                        | 154.98                  | 8,834                           | 0.001256 |
|              | <b>splicing</b> | 763                       | 142.23                  | 108,519                         | 0.015428 |

Supplementary Table S8 Statistics of single-copy ortholog families

| <b>Species</b>         | <b>Genes number</b> | <b>Unclustered genes</b> | <b>Family number</b> | <b>Unique gene families</b> | <b>Average genes per family</b> |
|------------------------|---------------------|--------------------------|----------------------|-----------------------------|---------------------------------|
| <i>L. longirostris</i> | 23,708              | 845                      | 15,642               | 68                          | 1.46                            |
| <i>D. rerio</i>        | 24,285              | 616                      | 15,307               | 64                          | 1.55                            |
| <i>A. mexicanus</i>    | 25,679              | 690                      | 15,926               | 102                         | 1.57                            |
| <i>G. aculeatus</i>    | 20,801              | 1,403                    | 13,897               | 34                          | 1.40                            |
| <i>G. maculatum</i>    | 21,755              | 3,173                    | 13,909               | 127                         | 1.34                            |
| <i>I. punctatus</i>    | 22,722              | 400                      | 15,413               | 32                          | 1.45                            |
| <i>L. oculatus</i>     | 18,199              | 1,213                    | 15,760               | 176                         | 1.08                            |
| <i>O. niloticus</i>    | 21,377              | 196                      | 14,155               | 12                          | 1.50                            |
| <i>O. latipes</i>      | 22,564              | 567                      | 14,743               | 60                          | 1.49                            |
| <i>P. fulvidraco</i>   | 23,258              | 246                      | 15,574               | 23                          | 1.48                            |
| <i>T. rubripes</i>     | 19,701              | 672                      | 14,224               | 36                          | 1.34                            |
